# Supplementary material for: Impacto de aditivos en lubricantes sobre la transmisión de calor en la ebullición del R134a y R123
Source: Royal Society of Chemistry journal article supplement (doi:10.1039/d4an00357h), 2007-01-01
Supplement: d4an00357h1.pdf [file d4an00357h1.pdf]

## Supporting information

### Self-enhanced solid state electrochemiluminescence sensing platform SiO<sub>2</sub>-PEI NPs and its application in the detection of spermine

Mathavan Sornambigai <sup>a,b</sup> Roselin Pavithra <sup>a,b</sup> Shekhar Handa <sup>a,c</sup> and Shanmugam Senthil Kumar <sup>a,b</sup> \*

<sup>a</sup>Electrodics and Electro Catalysis Division, CSIR-Central Electrochemical Research Institute (CSIR-CECRI), Karaikudi - 630 003, India

<sup>b</sup>Academy of Scientific and Innovative Research (AcSIR), Ghaziabad-201002, India

<sup>c</sup>Corrosion and Material Protection Division, CSIR-CECRI, Karaikudi – 630 003, India.

**\*Corresponding author**

ssenthilmugam@gmail.com; [senthilkumar@cecri.res.in](mailto:senthilkumar@cecri.res.in)

## Table of Contents

| S. No | CONTENTS                                                                                                                                                       |
|-------|----------------------------------------------------------------------------------------------------------------------------------------------------------------|
| 1.    | Schematic representation for the synthesis of SiO <sub>2</sub> -PEI NPs using stöber method..S-4                                                               |
| 2.    | Schematic representation of ink preparation for modifying GCE surface.....S-5                                                                                  |
| 3.    | Effect of pH.....S-6                                                                                                                                           |
| 4.    | Control experiments.....S-7                                                                                                                                    |
| 4.    | Effect of Scan rate.....S-8                                                                                                                                    |
| 5.    | ECL Quenching mechanism in O <sub>2</sub> atmosphere.....S-9                                                                                                   |
| 5.    | Chemical structure of spermine, spermidine, putrescine, and cadaverine.....S-10                                                                                |
| 6.    | Oxidation reaction sequence of Spermine on the SiO <sub>2</sub> -PEI NPs/[Ru(bpy) <sub>3</sub> ] <sup>2+</sup> /Nafion modified GCE electrode surface.....S-11 |
| 7.    | XPS survey spectrum of SiO <sub>2</sub> NPs and SiO <sub>2</sub> -PEI NPs.....S-12                                                                             |
| 8.    | Table S1 showing geometric optimization of biogenic amines using DFT.....S-13                                                                                  |
| 9.    | Table S2 showing HOMO/LUMO of biogenic amines.....S-14                                                                                                         |
| 10.   | Table S3 showing spin density data and plots .....S-15                                                                                                         |
| 11.   | Table S4 showing atomic charges and spin populations for molecules.....S-17                                                                                    |
| 12.   | Table S5 showing spin density of carbon radicals for biogenic amines.....S-20                                                                                  |
| 13.   | Table S6 showing atomic charges and spin populations.....S-21                                                                                                  |
| 14.   | Table S7 showing buried volume at main amine radical site.....S-28                                                                                             |

|            |                                                                                                                                                   |
|------------|---------------------------------------------------------------------------------------------------------------------------------------------------|
| <b>15.</b> | <b>Table S8 showing Buried volume at carbon radical site.....S-29</b>                                                                             |
| <b>16.</b> | <b>Table S9 Comparison of the developed system with other ECL methodologies for spermine detection.....S-32</b>                                   |
| <b>17.</b> | <b>Table S10 Quantification and recovery studies of spermine content in artificial urine sample using developed ECL detection method.....S-33</b> |
| <b>18.</b> | <b>References.....S-34</b>                                                                                                                        |

**Schematic representation for the synthesis of SiO<sub>2</sub>-PEI NPs using stöber method**

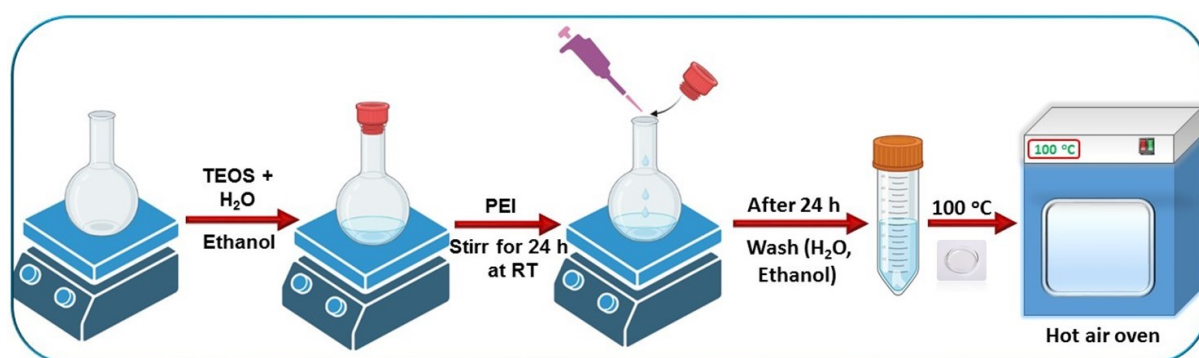

*Scheme S1. Schematic representation showing synthesis of SiO<sub>2</sub> NPs & SiO<sub>2</sub>-PEI NPs via stöber method;*

## Schematic representation of ink preparation for modifying GCE surface

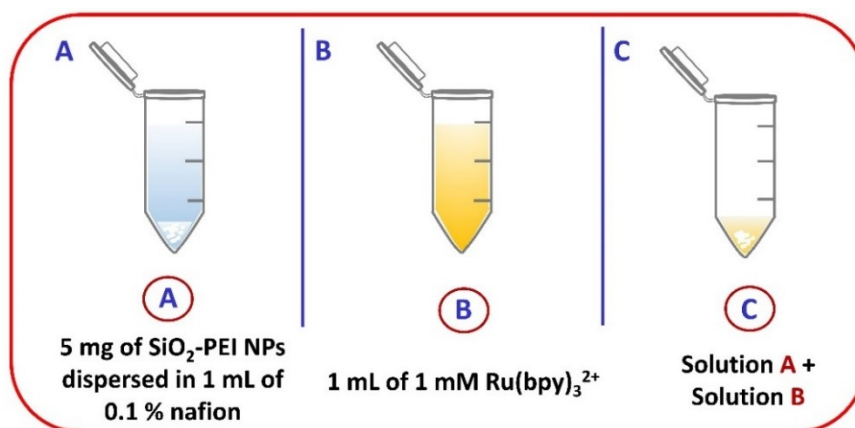

**Scheme S2.** Steps involved in the ink preparation of SiO<sub>2</sub> PEI NPs-[Ru(bpy)<sub>3</sub>]<sup>2+</sup>/Nf modified GCE surface.

## Control experiments

The CV and ECL intensity curves for  $[\text{Ru}(\text{bpy})_3]^{2+}/\text{Nf}$  and  $\text{SiO}_2$  PEI NPs- $[\text{Ru}(\text{bpy})_3]^{2+}/\text{Nf}$  modified GCE. As shown in the figure S2, the results suggest that the most effective enhancement in the ECL emission intensity was observed for the  $\text{SiO}_2$  PEI NPs- $[\text{Ru}(\text{bpy})_3]^{2+}/\text{Nf}$  modified GCE. Therefore, we have chosen  $\text{SiO}_2$  PEI NPs- $[\text{Ru}(\text{bpy})_3]^{2+}/\text{Nf}$  modified GCE for ECL experiments in the detection of spermine molecule. Also, in the case of  $\text{SiO}_2$  PEI NPs- $[\text{Ru}(\text{bpy})_3]^{2+}/\text{Nf}$  modified GCE, PEI NPs in the  $\text{SiO}_2$  PEI NPs matrix will act as a co-reactant accelerator, which plays crucial role in stabilizing the developed solid-state ECL sensing platform.

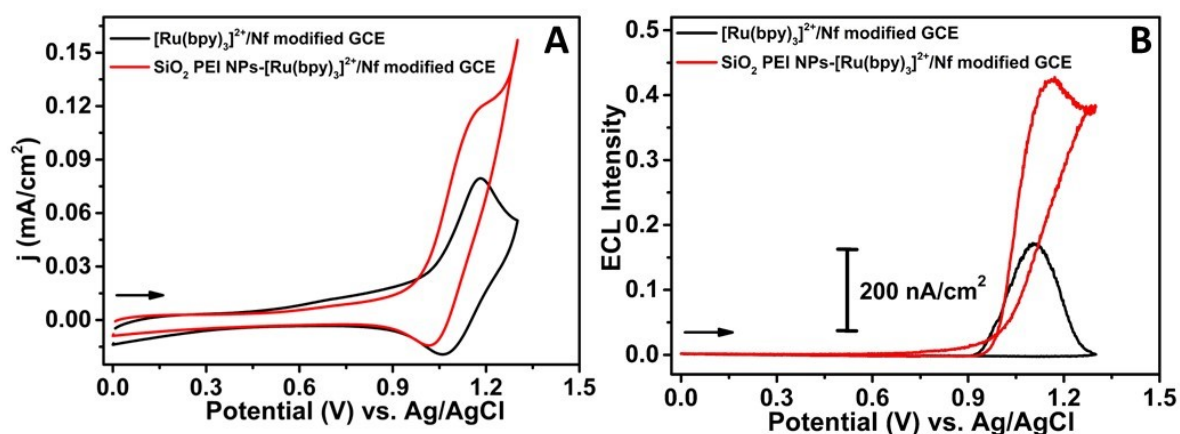

**Figure S1.** CV and ECL emission intensity plot of  $[\text{Ru}(\text{bpy})_3]^{2+}/\text{Nf}$  modified GCE (black); and  $\text{SiO}_2$  PEI NPs- $[\text{Ru}(\text{bpy})_3]^{2+}/\text{Nf}$  modified GCE (red) surface under  $\text{N}_2$ -saturated 0.1 M PBS electrolyte, with the scan rate of 50 mV/s.

### Effect of pH

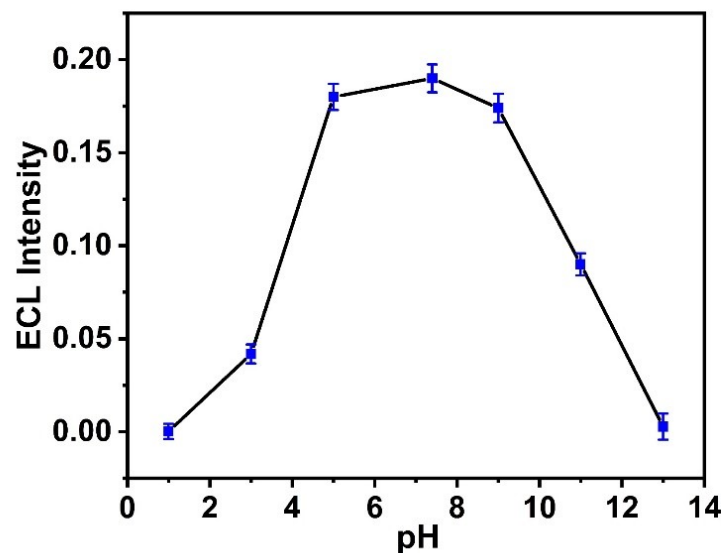

**Figure S2.** Derivative plot of ECL emission intensity recorded at a SiO<sub>2</sub> PEI NPs-[Ru(bpy)<sub>3</sub>]<sup>2+</sup>/Nf modified GCE surface under N<sub>2</sub>-saturated 0.1 M PBS electrolyte, with the scan rate of 50 mV/s.

The influence of pH on ECL emission intensity was also studied at a constant concentration of SiO<sub>2</sub> PEI NPs-[Ru(bpy)<sub>3</sub>]<sup>2+</sup>/Nf modified GCE under N<sub>2</sub> saturated 0.1 M PBS (pH 7.4) under cyclic voltammetric conditions, as shown in the Figure S2. The ECL of of SiO<sub>2</sub> PEI NPs-[Ru(bpy)<sub>3</sub>]<sup>2+</sup>/Nf modified GCE is highly dependent on pH of the electrolyte solution. As seen from the Figure S1, the ECL emission diminishes in the pH > 7.4 and however, at pH greater than 7.4, the ECL emission decreases gradually. Therefore, the physiological pH value 7.4 was chosen as the optimum pH for all the experimental work.

### Effect of Scan rate

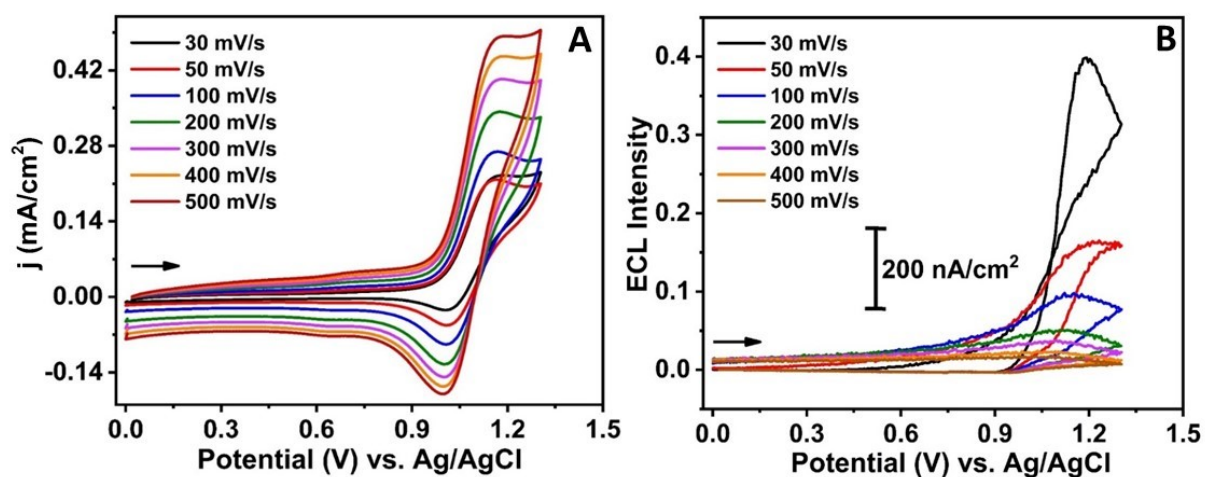

**Figure S3.** Shows the simultaneously recorded CV (A) and their ECL emission signals (B) in  $N_2$  0.1 M PBS (pH 7.4) electrolyte at a  $SiO_2$  PEI NPs- $[Ru(bpy)_3]^{2+}$ /Nf modified GCE surface under  $N_2$ -saturated 0.1 M PBS electrolyte, at different scan rates.



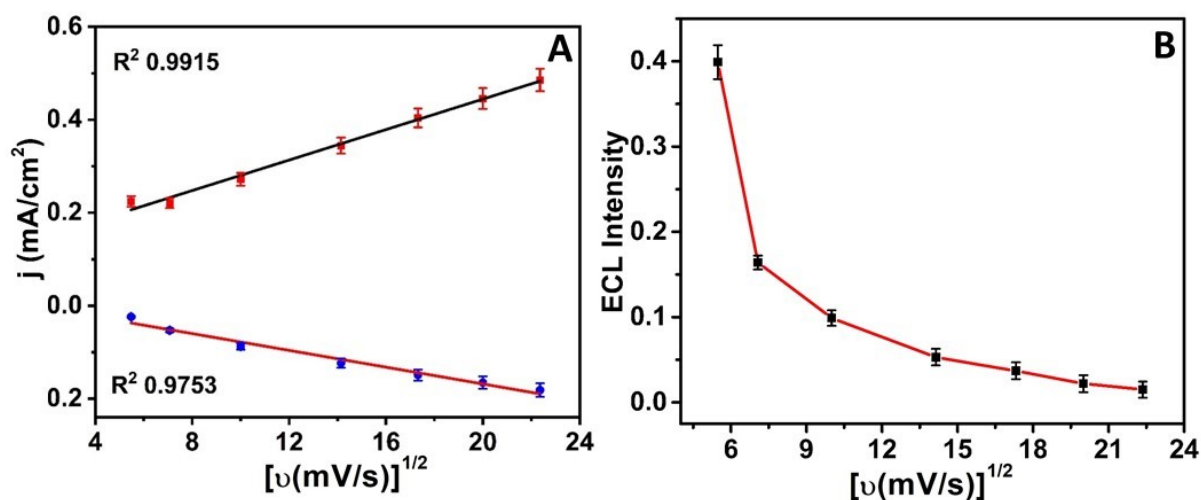

**Figure S4.** Linear plot for CV and their corresponding ECL signals recorded at a SiO<sub>2</sub> PEI NPs-[Ru(bpy)<sub>3</sub>]<sup>2+</sup>/Nf modified GCE surface under N<sub>2</sub>-saturated 0.1 M PBS electrolyte, at different scan rates.

### ECL quenching mechanism in O<sub>2</sub> atmosphere

The ECL quenching mechanism behind the [Ru(bpy)<sub>3</sub>]<sup>2+</sup> chemically modified SiO<sub>2</sub> PEI matrix in the presence of dissolved oxygen (O<sub>2</sub>) in the 0.1 M PBS electrolyte solution in the revised manuscript. Here, the formed [Ru(bpy)<sub>3</sub>]<sup>+</sup> reacts with the O<sub>2</sub> present in the electrolyte solution, which chemically produces the [Ru(bpy)<sub>3</sub>]<sup>2+</sup>, without the formation of excited state [Ru(bpy)<sub>3</sub>]<sup>2+\*</sup> [1, 2].

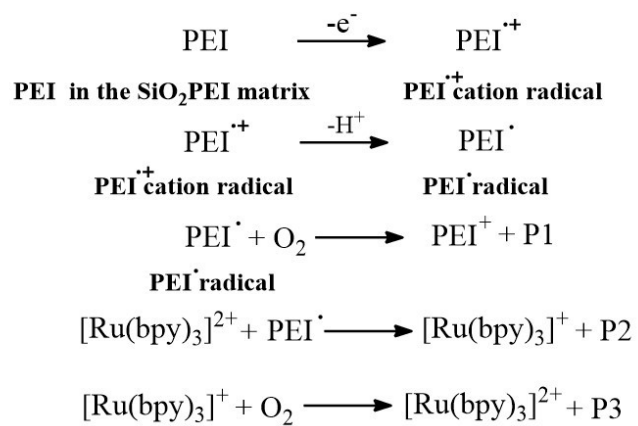

**Chemical structure of spermine, spermidine, putrescine, and cadaverine**

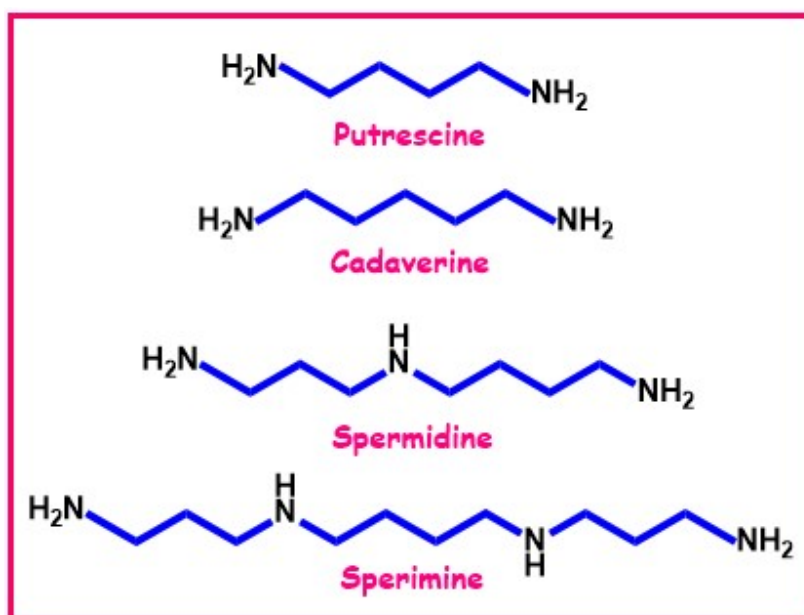

*Scheme S3. Schematic representation showing the chemical structure of the biogenic amines such as putrescine, cadaverine, spermidine, and spermine.*

**Oxidation reaction sequence of Spermine on the  $\text{SiO}_2$ -PEI NPs/ $[\text{Ru}(\text{bpy})_3]^{2+}$ /Nafion modified GCE electrode surface**

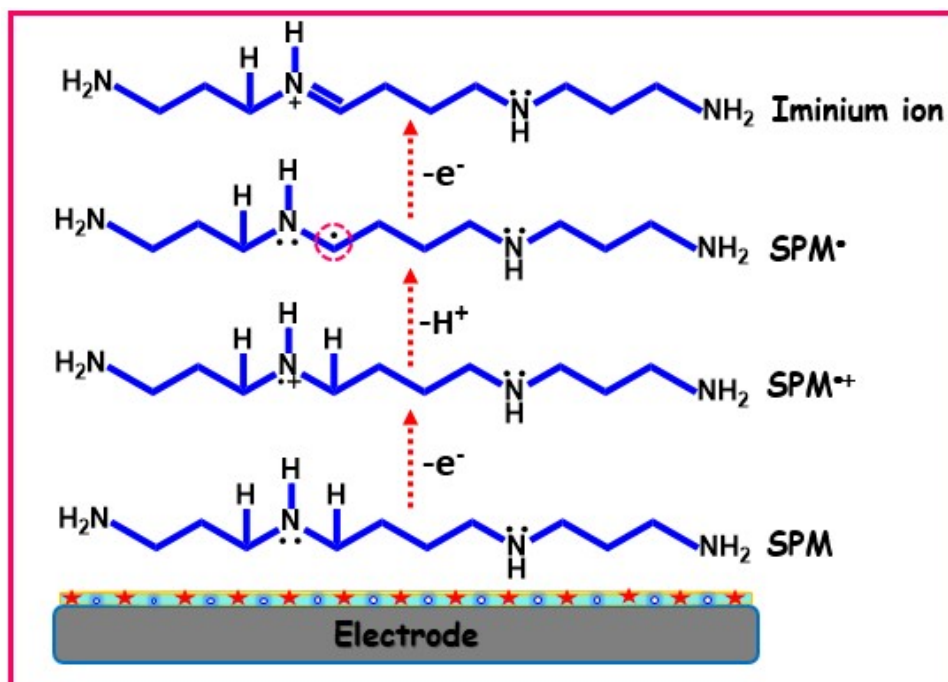

**Scheme S4.** Proposed schematic representation showing spermine (SPM) oxidation reaction sequence at a  $\text{SiO}_2$  PEI NPs- $[\text{Ru}(\text{bpy})_3]^{2+}/\text{Nf}$  modified GCE surface under  $\text{N}_2$ -saturated 0.1 M PBS electrolyte with its abbreviations.

### XPS survey spectrum of $\text{SiO}_2$ NPs and $\text{SiO}_2$ -PEI NPs

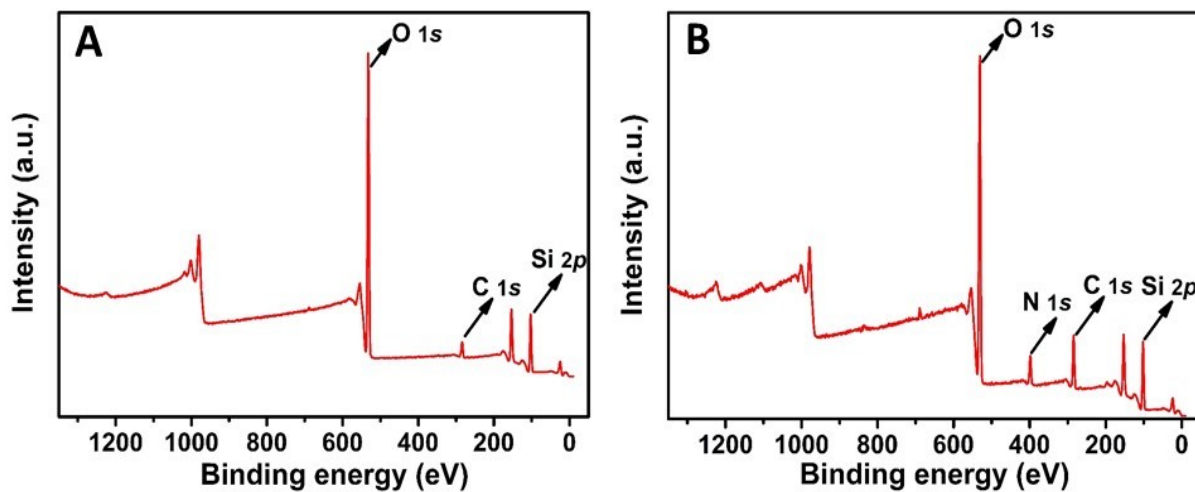

**Figure S4.** X-ray photoelectron spectroscopy (XPS) (a) survey spectrum of SiO<sub>2</sub> NPs; (b) survey spectrum of SiO<sub>2</sub> PEI NPs.

## Geometric optimization of spermine, spermidine, putrescine, and cadaverine using DFT

**Table S1: Optimized geometry (B3LYP-D4/TZVP level)**

**Putrascine**

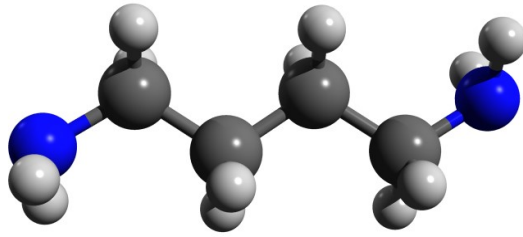

**Cadavarine**

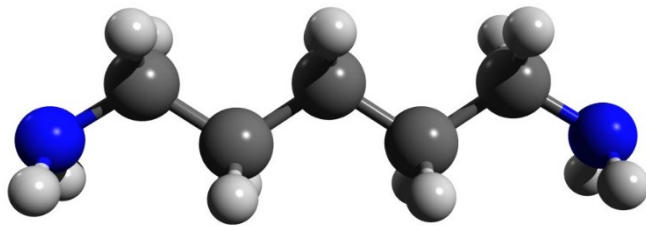

**Spermidine**

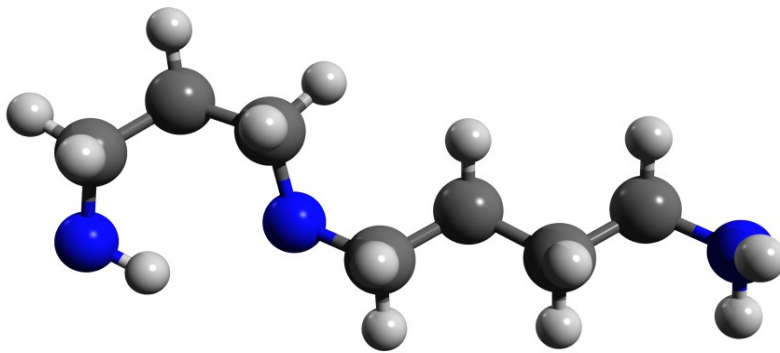

**Spermine**

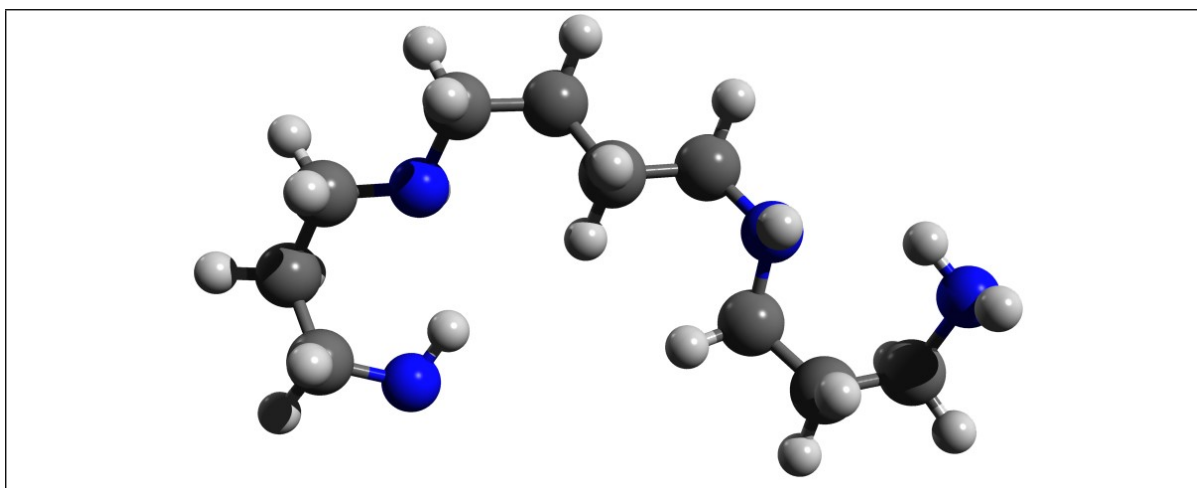

Images generated with Avogadro and POV-Ray [3, 4].

### HOMO/LUMO of spermine, spermidine, putrescine, and cadaverine

| Table S2: HOMO/LUMO of molecules [isovalue = 0.02]                                                          |                                                                                                             |
|-------------------------------------------------------------------------------------------------------------|-------------------------------------------------------------------------------------------------------------|
| <b>Putrescine</b>                                                                                           |                                                                                                             |
| 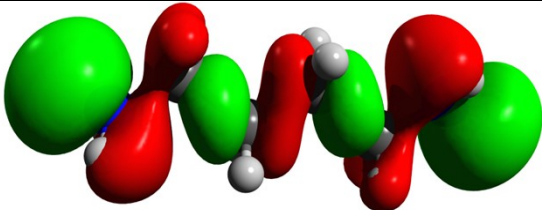 <p>HOMO (-6.339 eV)</p>  |  <p>LUMO (1.077 eV)</p>  |
| <b>Cadavarine</b>                                                                                           |                                                                                                             |
|  <p>HOMO (-6.371 eV)</p> |  <p>LUMO (1.056 eV)</p> |
| <b>Spermidine</b>                                                                                           |                                                                                                             |

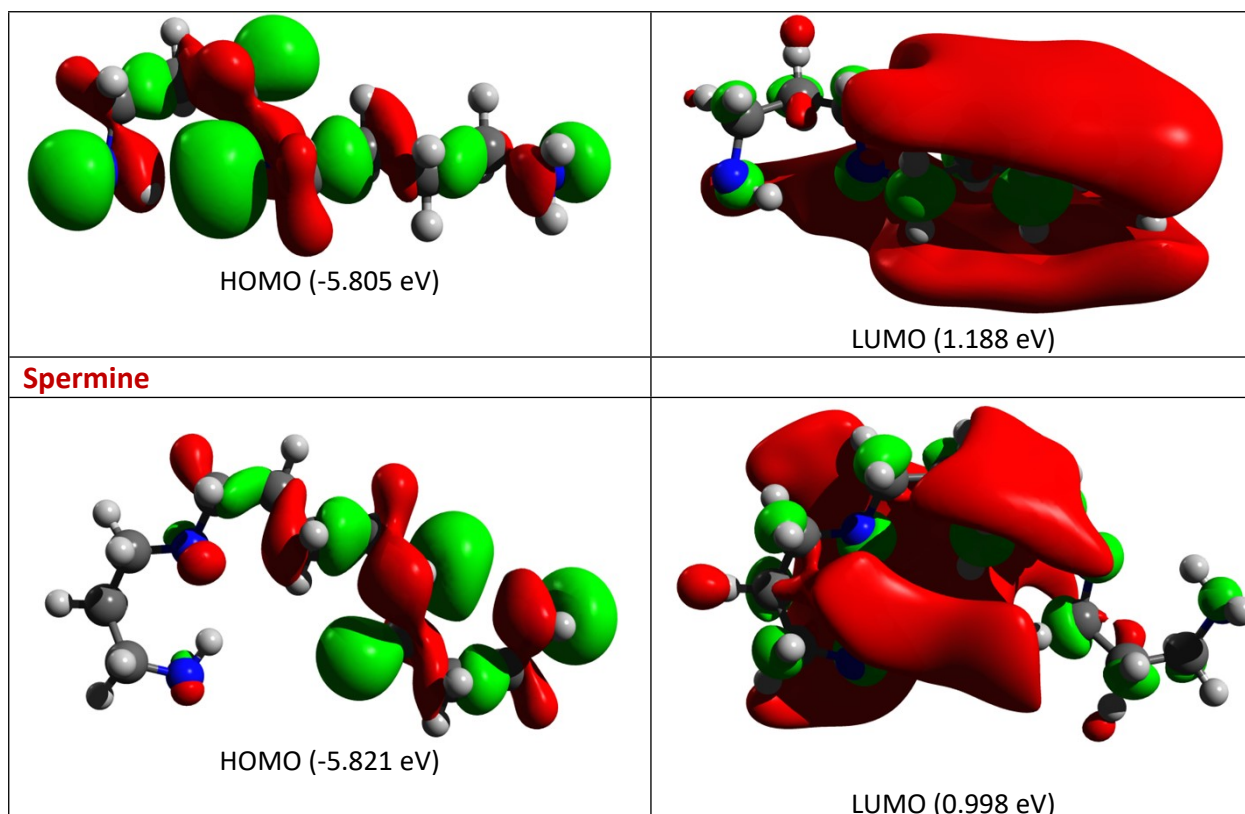

Images generated with Avogadro and POV-Ray.

### Spin density data and plots for spermine, spermidine, putrescine, and cadaverine

| Table S3: Spin density plots (Isovalue = 0.02)                                                                             |
|----------------------------------------------------------------------------------------------------------------------------|
| <p><b>Putrescine (+1 charged)</b></p> 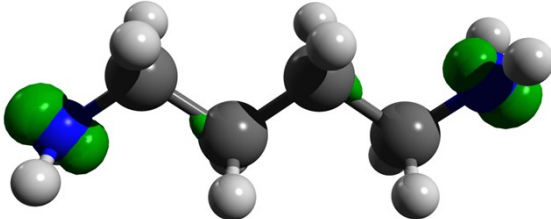 |
| <p><b>Cadavarine (+1 charged)</b></p>                                                                                      |



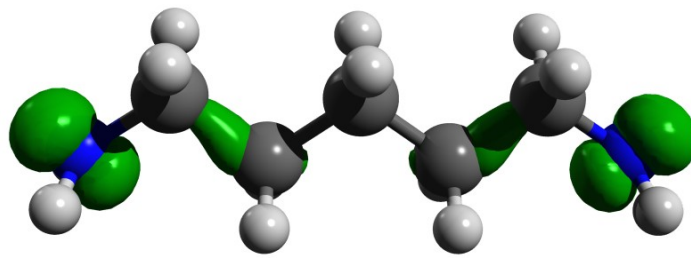

**Spermidine (+1 charged)**

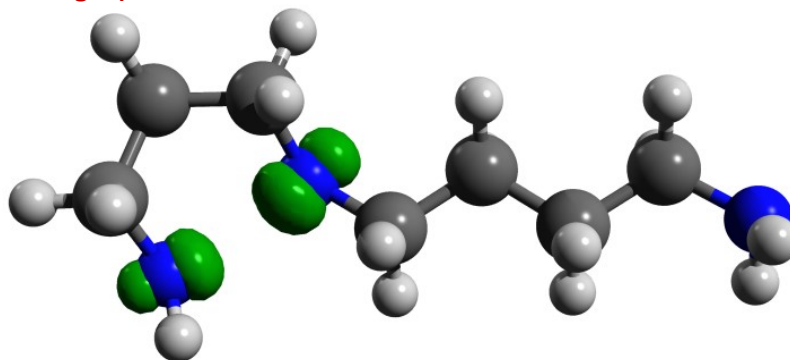

**Spermine (+1 charged)**

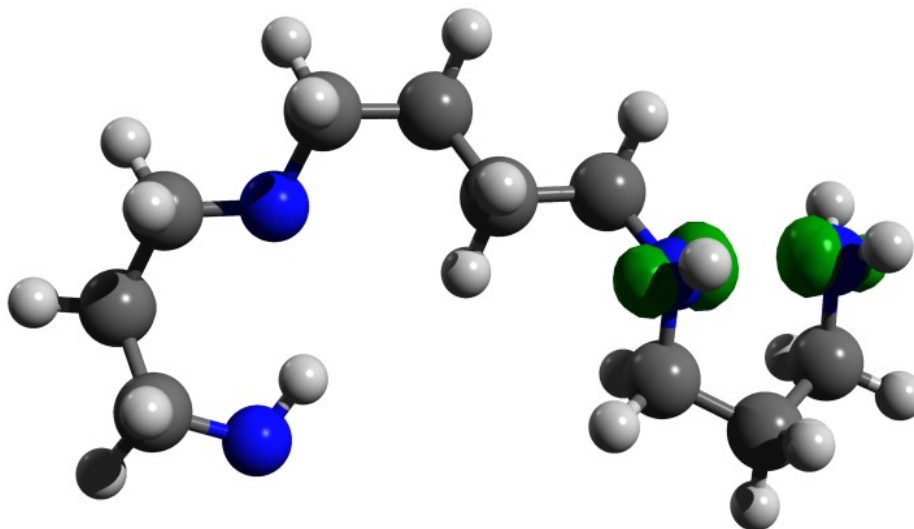

Images generated with Avogadro and POV-Ray.

**Atomic charges and spin populations for spermine, spermidine, putrescine, and cadaverine**

| <b>Table S4: Atomic charges and spin populations for molecules</b> |           |           |
|--------------------------------------------------------------------|-----------|-----------|
| Putrescine                                                         |           |           |
| -----                                                              |           |           |
| LOEWDIN ATOMIC CHARGES AND SPIN POPULATIONS                        |           |           |
| -----                                                              |           |           |
| 0 N :                                                              | 0.049580  | 0.361823  |
| 1 C :                                                              | -0.286485 | 0.051451  |
| 2 H :                                                              | 0.146886  | 0.003586  |
| 3 H :                                                              | 0.146880  | 0.003573  |
| 4 C :                                                              | -0.227772 | 0.070978  |
| 5 H :                                                              | 0.148629  | 0.000136  |
| 6 H :                                                              | 0.148626  | 0.000135  |
| 7 C :                                                              | -0.227778 | 0.070973  |
| 8 H :                                                              | 0.148623  | 0.000135  |
| 9 H :                                                              | 0.148627  | 0.000137  |
| 10 C :                                                             | -0.286498 | 0.051445  |
| 11 H :                                                             | 0.146880  | 0.003581  |
| 12 H :                                                             | 0.146878  | 0.003578  |
| 13 N :                                                             | 0.049532  | 0.361750  |
| 14 H :                                                             | 0.186846  | 0.004179  |
| 15 H :                                                             | 0.186845  | 0.004179  |
| 16 H :                                                             | 0.186849  | 0.004180  |
| 17 H :                                                             | 0.186852  | 0.004181  |
| Cadaverine                                                         |           |           |
| -----                                                              |           |           |
| LOEWDIN ATOMIC CHARGES AND SPIN POPULATIONS                        |           |           |
| -----                                                              |           |           |
| 0 C :                                                              | -0.289800 | 0.050082  |
| 1 C :                                                              | -0.230989 | 0.069050  |
| 2 H :                                                              | 0.145824  | -0.000198 |
| 3 H :                                                              | 0.145814  | -0.000206 |
| 4 C :                                                              | -0.235820 | 0.033434  |
| 5 H :                                                              | 0.146044  | -0.000176 |
| 6 H :                                                              | 0.146046  | -0.000176 |
| 7 C :                                                              | -0.230944 | 0.069106  |
| 8 H :                                                              | 0.145816  | -0.000205 |
| 9 H :                                                              | 0.145823  | -0.000196 |
| 10 C :                                                             | -0.289787 | 0.050140  |
| 11 H :                                                             | 0.145723  | 0.004081  |
| 12 H :                                                             | 0.145712  | 0.004062  |
| 13 N :                                                             | 0.039347  | 0.348421  |
| 14 H :                                                             | 0.185196  | 0.004137  |

|        |          |          |
|--------|----------|----------|
| 15 H : | 0.185189 | 0.004139 |
| 16 N : | 0.039091 | 0.348110 |
| 17 H : | 0.145693 | 0.004058 |
| 18 H : | 0.145701 | 0.004067 |
| 19 H : | 0.185162 | 0.004134 |
| 20 H : | 0.185159 | 0.004134 |

Spermidine

-----  
LOEWDIN ATOMIC CHARGES AND SPIN POPULATIONS  
-----

|        |           |           |
|--------|-----------|-----------|
| 0 H :  | 0.140637  | 0.000922  |
| 1 H :  | 0.147111  | -0.000309 |
| 2 C :  | -0.254941 | 0.046944  |
| 3 C :  | -0.306711 | 0.031435  |
| 4 C :  | -0.244784 | 0.037424  |
| 5 N :  | -0.037002 | 0.243320  |
| 6 H :  | 0.145854  | 0.008746  |
| 7 H :  | 0.154177  | -0.000395 |
| 8 C :  | -0.335234 | 0.009255  |
| 9 C :  | -0.261127 | 0.013802  |
| 10 H : | 0.138126  | 0.000427  |
| 11 H : | 0.138072  | -0.000006 |
| 12 C : | -0.240379 | 0.044926  |
| 13 H : | 0.144788  | 0.000810  |
| 14 H : | 0.144996  | -0.000242 |
| 15 C : | -0.263651 | 0.039499  |
| 16 H : | 0.151829  | 0.006843  |
| 17 H : | 0.149889  | 0.002216  |
| 18 N : | 0.197308  | 0.420421  |
| 19 H : | 0.214051  | 0.004775  |
| 20 H : | 0.172583  | 0.044350  |
| 21 H : | 0.166476  | 0.003327  |
| 22 H : | 0.176771  | 0.002547  |
| 23 H : | 0.130934  | 0.000137  |
| 24 H : | 0.130963  | 0.000127  |
| 25 N : | -0.169567 | 0.033936  |
| 26 H : | 0.156974  | 0.000354  |
| 27 H : | 0.157186  | 0.000392  |
| 28 H : | 0.154668  | 0.004019  |

Spermine

-----  
LOEWDIN ATOMIC CHARGES AND SPIN POPULATIONS  
-----

|       |           |           |
|-------|-----------|-----------|
| 0 H : | 0.128236  | 0.000218  |
| 1 H : | 0.134605  | -0.000033 |
| 2 C : | -0.304059 | 0.005745  |
| 3 C : | -0.343595 | 0.004861  |

|        |           |           |
|--------|-----------|-----------|
| 4 C :  | -0.271276 | 0.004725  |
| 5 N :  | -0.172582 | 0.042532  |
| 6 H :  | 0.127944  | 0.001111  |
| 7 H :  | 0.139916  | 0.000141  |
| 8 C :  | -0.270539 | 0.033063  |
| 9 C :  | -0.246921 | 0.036998  |
| 10 H : | 0.139859  | 0.000322  |
| 11 H : | 0.143340  | -0.000301 |
| 12 C : | -0.251669 | 0.008689  |
| 13 H : | 0.143585  | 0.000069  |
| 14 H : | 0.141313  | -0.000068 |
| 15 C : | -0.297284 | 0.014648  |
| 16 H : | 0.136225  | 0.001426  |
| 17 H : | 0.130608  | 0.011864  |
| 18 N : | 0.016659  | 0.063973  |
| 19 H : | 0.181845  | 0.000711  |
| 20 H : | 0.124311  | 0.005972  |
| 21 H : | 0.144185  | 0.000511  |
| 22 H : | 0.153493  | 0.000322  |
| 23 H : | 0.148053  | 0.005119  |
| 24 H : | 0.147588  | 0.002310  |
| 25 N : | 0.174055  | 0.375513  |
| 26 H : | 0.135532  | 0.001006  |
| 27 H : | 0.173460  | 0.002246  |
| 28 H : | 0.152081  | -0.000372 |
| 29 H : | 0.143386  | 0.007784  |
| 30 N : | -0.056316 | 0.215940  |
| 31 C : | -0.311490 | 0.027883  |
| 32 C : | -0.248536 | 0.033149  |
| 33 C : | -0.261090 | 0.041674  |
| 34 H : | 0.163862  | 0.003013  |
| 35 H : | 0.145328  | -0.000281 |
| 36 H : | 0.138853  | 0.000816  |
| 37 H : | 0.209416  | 0.004391  |
| 38 H : | 0.165531  | 0.038753  |
| 39 H : | 0.152088  | 0.003555  |

| Table S5: Spin density plots for carbon radicals<br>(Isovalue = 0.02)                                                                     | Radical stabilization<br>energy<br>(Kcal/mol) |
|-------------------------------------------------------------------------------------------------------------------------------------------|-----------------------------------------------|
| <b>Putrascine</b>                                                                                                                         |                                               |
| 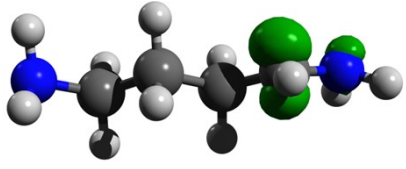                                                         | 13.44913                                      |
| <b>Cadavarine</b>                                                                                                                         |                                               |
|                                                          | 13.45222                                      |
| <b>Spermidine</b>                                                                                                                         |                                               |
| <p data-bbox="558 884 678 907"><b>Radical 1</b></p>     | 14.70367                                      |
| <p data-bbox="558 1176 678 1198"><b>Radical 2</b></p>  | 17.00095                                      |
| <b>Spermine</b>                                                                                                                           |                                               |
| <p data-bbox="558 1523 678 1545"><b>Radical 1</b></p>  | 16.26578                                      |

|           |                                                                                     |          |
|-----------|-------------------------------------------------------------------------------------|----------|
| Radical 2 | 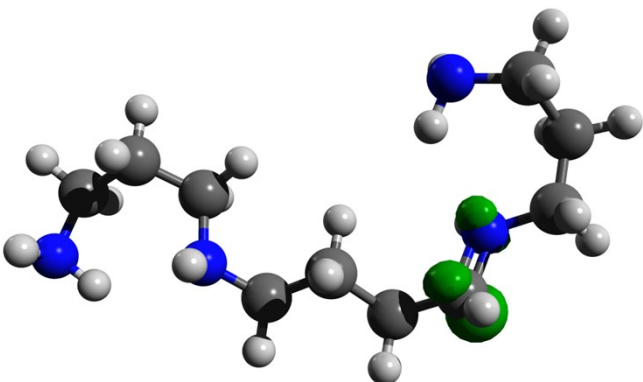   | 15.14198 |
| Radical 3 |   | 16.9253  |
| Radical 4 |  | 14.77138 |

**Table S6: ATOMIC CHARGES AND SPIN POPULATIONS**

| Putrascine                                  |                    |
|---------------------------------------------|--------------------|
| -----                                       |                    |
| LOEWDIN ATOMIC CHARGES AND SPIN POPULATIONS |                    |
| -----                                       |                    |
| 0 N :                                       | -0.192173 0.063899 |
| 1 C :                                       | -0.234932 0.785333 |
| 2 H :                                       | 0.119289 0.007492  |
| 3 C :                                       | -0.288238 0.063033 |

|        |           |           |
|--------|-----------|-----------|
| 4 H :  | 0.136001  | 0.005920  |
| 5 H :  | 0.141873  | 0.033020  |
| 6 C :  | -0.279996 | 0.002561  |
| 7 H :  | 0.132223  | -0.000198 |
| 8 H :  | 0.131905  | 0.001114  |
| 9 C :  | -0.340725 | 0.000413  |
| 10 H : | 0.126941  | 0.000025  |
| 11 H : | 0.126849  | 0.000511  |
| 12 N : | -0.201934 | -0.000067 |
| 13 H : | 0.152572  | 0.000047  |
| 14 H : | 0.152531  | 0.000003  |
| 15 H : | 0.162486  | 0.034139  |
| 16 H : | 0.155327  | 0.002758  |

### Cadavarine

-----  
 LOEWDIN ATOMIC CHARGES AND SPIN POPULATIONS  
 -----

|        |           |           |
|--------|-----------|-----------|
| 0 C :  | -0.235144 | 0.785240  |
| 1 C :  | -0.289281 | 0.063125  |
| 2 H :  | 0.135517  | 0.005923  |
| 3 H :  | 0.141446  | 0.033172  |
| 4 C :  | -0.264314 | 0.002433  |
| 5 H :  | 0.135076  | -0.000192 |
| 6 H :  | 0.134731  | 0.001155  |
| 7 C :  | -0.279663 | 0.000388  |
| 8 H :  | 0.131649  | 0.000041  |
| 9 H :  | 0.131552  | 0.000486  |
| 10 C : | -0.340318 | 0.000013  |
| 11 H : | 0.126487  | 0.000011  |
| 12 H : | 0.126523  | 0.000054  |
| 13 N : | -0.202838 | -0.000094 |
| 14 H : | 0.152335  | 0.000010  |
| 15 H : | 0.152348  | -0.000002 |
| 16 N : | -0.192717 | 0.063811  |
| 17 H : | 0.119010  | 0.007563  |
| 18 H : | 0.155240  | 0.002742  |
| 19 H : | 0.162362  | 0.034120  |

### Spermidine

Radical 1

-----  
 LOEWDIN ATOMIC CHARGES AND SPIN POPULATIONS  
 -----

|       |           |          |
|-------|-----------|----------|
| 0 H : | 0.126025  | 0.000042 |
| 1 H : | 0.133365  | 0.000270 |
| 2 C : | -0.309312 | 0.008869 |

|        |           |           |
|--------|-----------|-----------|
| 3 C :  | -0.340261 | 0.000206  |
| 4 C :  | -0.279594 | 0.001571  |
| 5 N :  | -0.211262 | 0.000037  |
| 6 H :  | 0.126307  | 0.000032  |
| 7 H :  | 0.140741  | -0.000148 |
| 8 C :  | -0.341120 | 0.000442  |
| 9 C :  | -0.279461 | 0.002372  |
| 10 H : | 0.132159  | -0.000215 |
| 11 H : | 0.132338  | 0.001106  |
| 12 C : | -0.279177 | 0.062941  |
| 13 H : | 0.136689  | 0.005820  |
| 14 H : | 0.143226  | 0.032755  |
| 15 C : | -0.204458 | 0.779184  |
| 16 H : | 0.121460  | 0.006420  |
| 17 N : | -0.020835 | 0.063493  |
| 18 H : | 0.180253  | 0.030603  |
| 19 H : | 0.119091  | 0.001551  |
| 20 H : | 0.136215  | -0.000109 |
| 21 H : | 0.149800  | 0.000020  |
| 22 H : | 0.126950  | 0.000030  |
| 23 H : | 0.126850  | 0.000512  |
| 24 N : | -0.201977 | -0.000075 |
| 25 H : | 0.152515  | 0.000005  |
| 26 H : | 0.152712  | 0.000045  |
| 27 H : | 0.130761  | 0.002220  |

Radical 2

-----  
 LOEWDIN ATOMIC CHARGES AND SPIN POPULATIONS  
 -----

|        |           |           |
|--------|-----------|-----------|
| 0 H :  | 0.125535  | 0.001546  |
| 1 H :  | 0.140859  | 0.031351  |
| 2 C :  | -0.209066 | 0.759342  |
| 3 C :  | -0.340627 | 0.009297  |
| 4 C :  | -0.294565 | 0.049170  |
| 5 N :  | -0.209936 | 0.001624  |
| 6 H :  | 0.126620  | 0.000497  |
| 7 H :  | 0.141168  | 0.001758  |
| 8 C :  | -0.340754 | 0.000069  |
| 9 C :  | -0.277444 | 0.000038  |
| 10 H : | 0.132122  | 0.000055  |
| 11 H : | 0.132595  | 0.000027  |
| 12 C : | -0.269954 | 0.002313  |
| 13 H : | 0.133533  | -0.000056 |
| 14 H : | 0.133746  | 0.000202  |
| 15 C : | -0.313993 | 0.008298  |
| 16 H : | 0.130675  | 0.001454  |
| 17 H : | 0.130268  | 0.002585  |



|        |           |           |
|--------|-----------|-----------|
| 18 N : | -0.013259 | 0.077804  |
| 19 H : | 0.180263  | 0.030881  |
| 20 H : | 0.119552  | 0.021977  |
| 21 H : | 0.136441  | -0.000508 |
| 22 H : | 0.149886  | 0.000217  |
| 23 H : | 0.126791  | 0.000006  |
| 24 H : | 0.126775  | 0.000001  |
| 25 N : | -0.202221 | 0.000050  |
| 26 H : | 0.152414  | 0.000001  |
| 27 H : | 0.152576  | 0.000001  |

### Spermine

Radical 1

-----  
LOEWDIN ATOMIC CHARGES AND SPIN POPULATIONS  
-----

|        |           |           |
|--------|-----------|-----------|
| 0 H :  | 0.123136  | 0.001687  |
| 1 H :  | 0.135691  | 0.005826  |
| 2 C :  | -0.315684 | 0.617804  |
| 3 C :  | -0.337545 | 0.035670  |
| 4 C :  | -0.305326 | 0.056777  |
| 5 N :  | -0.199117 | 0.004589  |
| 6 H :  | 0.124271  | 0.006120  |
| 7 H :  | 0.141960  | 0.004565  |
| 8 C :  | -0.314513 | 0.000348  |
| 9 C :  | -0.272402 | 0.003265  |
| 10 H : | 0.129945  | 0.001458  |
| 11 H : | 0.133335  | 0.000095  |
| 12 C : | -0.263587 | 0.000046  |
| 13 H : | 0.139443  | 0.000090  |
| 14 H : | 0.137434  | -0.000093 |
| 15 C : | -0.289354 | 0.019742  |
| 16 H : | 0.134889  | 0.001932  |
| 17 H : | 0.120187  | 0.012903  |
| 18 N : | 0.058333  | 0.211374  |
| 19 H : | 0.185290  | 0.007255  |
| 20 H : | 0.119140  | 0.007599  |
| 21 H : | 0.142806  | 0.000704  |
| 22 H : | 0.152595  | 0.000058  |
| 23 H : | 0.128928  | 0.000121  |
| 24 H : | 0.130313  | 0.000022  |
| 25 N : | -0.023386 | 0.000001  |
| 26 H : | 0.149129  | -0.000000 |
| 27 H : | 0.139974  | 0.000001  |
| 28 H : | 0.125860  | -0.000000 |
| 29 N : | -0.212562 | -0.000000 |
| 30 C : | -0.340731 | 0.000000  |

|        |           |           |
|--------|-----------|-----------|
| 31 C : | -0.279738 | 0.000002  |
| 32 C : | -0.309956 | 0.000036  |
| 33 H : | 0.134992  | -0.000002 |
| 34 H : | 0.132812  | 0.000000  |
| 35 H : | 0.125665  | 0.000000  |
| 36 H : | 0.170604  | 0.000001  |
| 37 H : | 0.116485  | 0.000002  |
| 38 H : | 0.130683  | 0.000001  |

Radical 2

-----  
LOEWDIN ATOMIC CHARGES AND SPIN POPULATIONS  
-----

|        |           |           |
|--------|-----------|-----------|
| 0 H :  | 0.127187  | 0.000002  |
| 1 H :  | 0.134595  | -0.000082 |
| 2 C :  | -0.291974 | 0.019351  |
| 3 C :  | -0.338905 | 0.000917  |
| 4 C :  | -0.277362 | -0.000047 |
| 5 N :  | -0.205578 | 0.005165  |
| 6 H :  | 0.127239  | 0.000010  |
| 7 H :  | 0.141940  | 0.000067  |
| 8 C :  | -0.316320 | 0.003938  |
| 9 C :  | -0.268562 | 0.033713  |
| 10 H : | 0.129806  | -0.000232 |
| 11 H : | 0.130417  | 0.000768  |
| 12 C : | -0.289152 | 0.055391  |
| 13 H : | 0.140681  | 0.002638  |
| 14 H : | 0.138499  | 0.007496  |
| 15 C : | -0.310820 | 0.628325  |
| 16 H : | 0.118978  | 0.008213  |
| 17 N : | 0.058047  | 0.201727  |
| 18 H : | 0.186142  | 0.007326  |
| 19 H : | 0.120493  | 0.013019  |
| 20 H : | 0.139367  | 0.004518  |
| 21 H : | 0.151133  | 0.000492  |
| 22 H : | 0.129025  | 0.000054  |
| 23 H : | 0.130034  | 0.000019  |
| 24 N : | -0.023621 | 0.004069  |
| 25 H : | 0.135500  | 0.001921  |
| 26 H : | 0.149226  | 0.000016  |
| 27 H : | 0.139938  | 0.000027  |
| 28 H : | 0.125870  | 0.000002  |
| 29 N : | -0.212613 | 0.000148  |
| 30 C : | -0.340928 | 0.000030  |
| 31 C : | -0.279782 | 0.000036  |
| 32 C : | -0.309793 | 0.000400  |

|        |          |          |
|--------|----------|----------|
| 33 H : | 0.134952 | 0.000162 |
| 34 H : | 0.132828 | 0.000001 |
| 35 H : | 0.125598 | 0.000003 |
| 36 H : | 0.170549 | 0.000084 |
| 37 H : | 0.116672 | 0.000300 |
| 38 H : | 0.130692 | 0.000012 |

Radical 3

-----  
LOEWDIN ATOMIC CHARGES AND SPIN POPULATIONS  
-----

|        |           |           |
|--------|-----------|-----------|
| 0 H :  | 0.125861  | 0.000001  |
| 1 H :  | 0.132850  | -0.000000 |
| 2 C :  | -0.310841 | 0.000031  |
| 3 C :  | -0.340566 | 0.000018  |
| 4 C :  | -0.279224 | 0.000009  |
| 5 N :  | -0.210897 | 0.000078  |
| 6 H :  | 0.125998  | 0.000003  |
| 7 H :  | 0.140180  | 0.000003  |
| 8 C :  | -0.303323 | 0.015248  |
| 9 C :  | -0.271143 | 0.012310  |
| 10 H : | 0.130374  | 0.002607  |
| 11 H : | 0.134073  | -0.000117 |
| 12 C : | -0.264229 | 0.000694  |
| 13 H : | 0.138330  | 0.000467  |
| 14 H : | 0.136307  | 0.000009  |
| 15 C : | -0.308103 | 0.000642  |
| 16 H : | 0.130128  | -0.000001 |
| 17 H : | 0.115813  | 0.000081  |
| 18 N : | -0.023216 | 0.000155  |
| 19 H : | 0.173340  | 0.000011  |
| 20 H : | 0.115310  | 0.000005  |
| 21 H : | 0.136608  | -0.000014 |
| 22 H : | 0.149469  | 0.000007  |
| 23 H : | 0.131445  | 0.000460  |
| 24 H : | 0.132891  | 0.000720  |
| 25 N : | 0.026261  | 0.183659  |
| 26 H : | 0.130057  | 0.000002  |
| 27 H : | 0.151485  | 0.000099  |
| 28 H : | 0.140572  | 0.002312  |
| 29 H : | 0.128062  | 0.005161  |
| 30 N : | -0.204425 | 0.009032  |
| 31 C : | -0.337178 | 0.029507  |

|        |           |          |
|--------|-----------|----------|
| 32 C : | -0.306084 | 0.051707 |
| 33 C : | -0.268895 | 0.658918 |
| 34 H : | 0.139972  | 0.003770 |
| 35 H : | 0.133436  | 0.002515 |
| 36 H : | 0.126300  | 0.000292 |
| 37 H : | 0.181219  | 0.006377 |
| 38 H : | 0.121782  | 0.013220 |

Radical 4

-----  
LOEWDIN ATOMIC CHARGES AND SPIN POPULATIONS  
-----

|        |           |           |
|--------|-----------|-----------|
| 0 H :  | 0.125906  | -0.000001 |
| 1 H :  | 0.132901  | -0.000000 |
| 2 C :  | -0.310613 | 0.000473  |
| 3 C :  | -0.340436 | 0.000013  |
| 4 C :  | -0.279181 | -0.000003 |
| 5 N :  | -0.210961 | 0.000054  |
| 6 H :  | 0.126047  | 0.000004  |
| 7 H :  | 0.140250  | 0.000008  |
| 8 C :  | -0.219631 | 0.751535  |
| 9 C :  | -0.283559 | 0.066647  |
| 10 H : | 0.139382  | 0.030152  |
| 11 H : | 0.136599  | 0.005097  |
| 12 C : | -0.266800 | 0.003524  |
| 13 H : | 0.137760  | 0.001478  |
| 14 H : | 0.135994  | -0.000123 |
| 15 C : | -0.309040 | -0.000507 |
| 16 H : | 0.130086  | 0.000026  |
| 17 H : | 0.115738  | -0.000147 |
| 18 N : | -0.022951 | 0.003251  |
| 19 H : | 0.173526  | 0.000090  |
| 20 H : | 0.115545  | 0.000147  |
| 21 H : | 0.136482  | 0.000200  |
| 22 H : | 0.149575  | -0.000003 |
| 23 H : | 0.119819  | 0.005864  |
| 24 N : | -0.015499 | 0.085535  |
| 25 H : | 0.130145  | 0.000015  |
| 26 H : | 0.150065  | 0.000110  |
| 27 H : | 0.141762  | 0.001011  |
| 28 H : | 0.126657  | -0.000033 |
| 29 N : | -0.210169 | 0.001750  |
| 30 C : | -0.339832 | 0.000471  |
| 31 C : | -0.278289 | 0.003085  |

|        |           |           |
|--------|-----------|-----------|
| 32 C : | -0.303167 | 0.036313  |
| 33 H : | 0.136989  | 0.000693  |
| 34 H : | 0.133987  | -0.000087 |
| 35 H : | 0.126290  | 0.000034  |
| 36 H : | 0.173892  | 0.001019  |
| 37 H : | 0.121069  | 0.001286  |
| 38 H : | 0.133663  | 0.001019  |

**Table S7: Buried volume at main amine radical site**

Putrascine

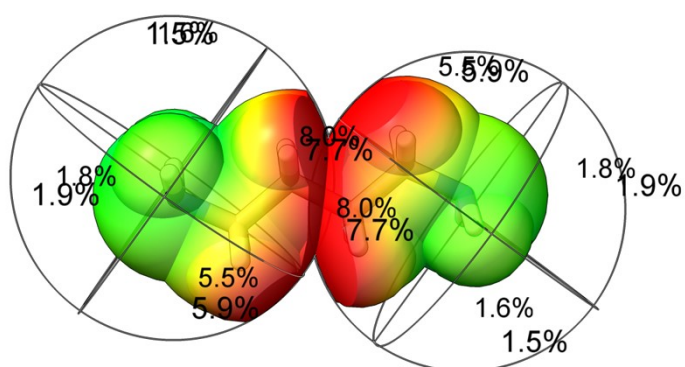

**% Buried volume at radical centre = 33.8**

Cadavarine

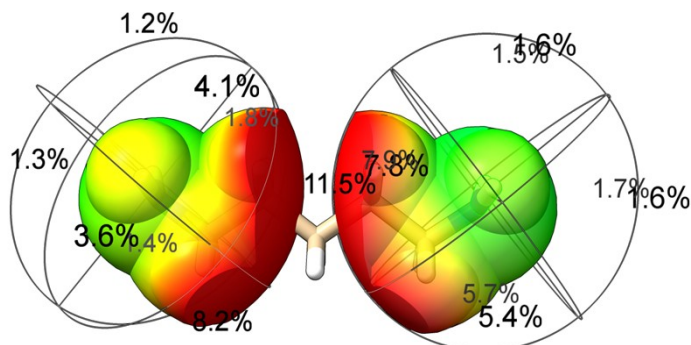

**% Buried volume at radical centre = 33.2**

Spermidine

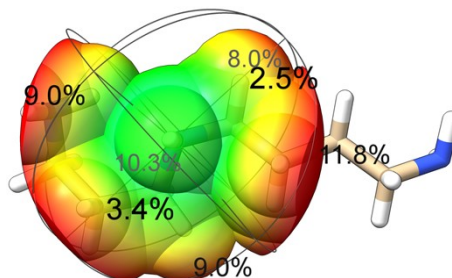

**% Buried volume at radical centre = 56.5**

Spermine

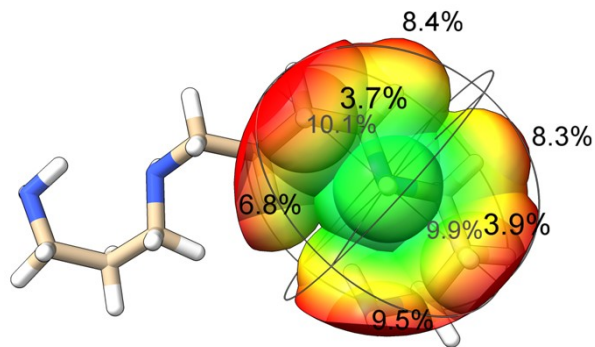

**% Buried volume at radical centre = 60.7**

Images generated with chimera and buried volume calculated using SEQCROW.

| Table S8: Buried volume at carbon radical site | % Buried volume at radical centre (% $V_{bur}$ ) |
|------------------------------------------------|--------------------------------------------------|
| <b>Putrascine</b>                              |                                                  |
|                                                | <b>44.6</b>                                      |
| <b>Cadavarine</b>                              |                                                  |
|                                                | <b>44.4</b>                                      |

| <b>Spermidine</b> |             |
|-------------------|-------------|
| <p>Radical 1</p>  | <b>53.1</b> |
| <p>Radical 2</p>  | <b>56.5</b> |
| <b>Spermine</b>   |             |
| <p>Radical 1</p>  | <b>53.6</b> |
| <p>Radical 2</p>  | <b>54.5</b> |

|                                                                                                     |             |
|-----------------------------------------------------------------------------------------------------|-------------|
| <p>Radical 3</p> 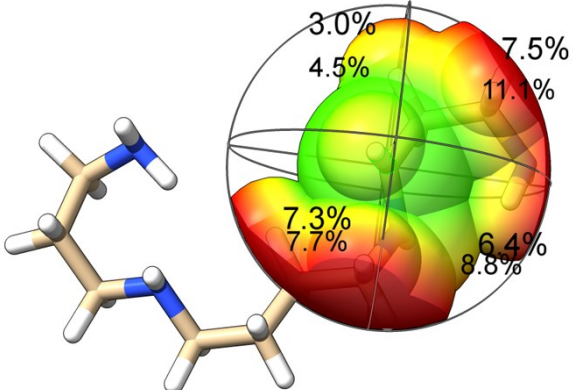  | <p>56.3</p> |
| <p>Radical 4</p>  | <p>53.8</p> |

Images generated with chimera and buried volume calculated using SEQCROW [5].



**Table S9. Comparison of the developed system with other ECL methodologies for spermine detection**

| <b>S. no.</b> | <b>Analytical method</b> | <b>Linear range</b>                    | <b>LOD</b>        | <b>Ref.</b> |
|---------------|--------------------------|----------------------------------------|-------------------|-------------|
| 1.            | ECL-CE                   | 0.25 $\mu\text{M}$ – 0.5 $\mu\text{M}$ | 0.2 $\mu\text{M}$ | [6]         |
| 2.            | Electrochemical analysis | 3 $\mu\text{M}$ to 300 $\mu\text{M}$   | 1 $\mu\text{M}$   | [7]         |
| 3.            | Luminescence analysis    | 5 $\mu\text{M}$ to 0.5 mM              | 0.5 $\mu\text{M}$ | [8]         |
| 4.            | Solid-state ECL method   | 10 nM to 100 nM                        | 12.2 nM           | This work   |

**Table S10. Quantification and recovery studies of spermine content in urine sample using developed ECL detection method.**

| <b>Sample No.</b> | <b>Original content (10<sup>-9</sup> M)</b> | <b>Added (10<sup>-9</sup> M)</b> | <b>Found (10<sup>-9</sup> M)</b> | <b>Recovery (%)</b> | <b><i>t</i>-test</b> |
|-------------------|---------------------------------------------|----------------------------------|----------------------------------|---------------------|----------------------|
| 1.                | 13.2                                        | 10 nM                            | 13.3±0.004                       | 105 %               | 0.495                |
| 2.                |                                             | 30 nM                            | 20.6±0.001                       | 93.5 %              | 0.012                |
| 3.                |                                             | 50 nM                            | 49.6±0.12                        | 86.4 %              | 0.866                |

## References

- [1] Zheng, H.; Zu, Y. Emission of Tris(2,2'-Bipyridine)Ruthenium(II) by Coreactant Electrogenerated Chemiluminescence: From O<sub>2</sub>-Insensitive to Highly O<sub>2</sub>-Sensitive. *J. Phys. Chem. B* 2005, 109 (24), 12049–12053. <https://doi.org/10.1021/jp050350d>.
- [2] Gross, E. M.; Pastore, P.; Wightman, R. M. High-Frequency Electrochemiluminescent Investigation of the Reaction Pathway between Tris(2,2'-Bipyridyl)Ruthenium(II) and Tripropylamine Using Carbon Fiber Microelectrodes. *J. Phys. Chem. B* 2001, 105 (37), 8732–8738. <https://doi.org/10.1021/jp011434z>.
- [3] (a) Parkinson, C. J.; Mayer, P. M.; Radom, L. *Theor. Chem. Acc.* **1999**, 102, 92. <https://doi.org/10.1007/s002140050477>; (b) Parkinson, C. J.; Mayer, P. M.; Radom, L. *J. Chem.Soc., Perkin Trans. 2* **1999**, 11, 2305. <https://doi.org/10.1039/A905476F>.
- [4] S. S. V. Sowndarya, P. C. St. John, R. S. Paton, *Chem. Sci.* 2021, 12, 13158-13166. <https://doi.org/10.1039/D1SC02770K>.
- [5] (a) A. J. Schaefer, V. M. Ingman, and S. E. Wheeler, "SEQCROW: A ChimeraX Bundle to Facilitate Quantum Chemical Applications to Complex Molecular Systems" *J. Comp. Chem.* 42, 1750 (2021). <https://doi.org/10.1002/jcc.26700>; (b) V. M. Ingman, A. J. Schaefer, L. R. Andreola, and S. E. Wheeler, "QChASM: Quantum Chemistry Automation and Structure Manipulation" *WIREs Comp. Mol. Sci.* 11, e1510 (2021). <https://doi.org/10.1002/wcms.1510>.
- [6] H. Li, X. Liu, W. Niu, S. Zhu, L. Fan, L. Shi and G. Xu, "CEC with tris (2,2'-bipyridyl) ruthenium (II) electrochemiluminescent detection" *Electrophoresis*, 2008, **29**, 4475–4481.

- [7] A. Boffi, G. Favero, R. Federico, A. Maccone, R. Antiochia, C. Tortolini, G. Sanz3 and F. Mazzei, “Amine oxidase-based biosensors for spermine and spermidine determination” *Anal. Bioanal. Chem.*, 2015, 407, 1131–1137.
- [8] Z. Hu and B. Yan, Deep Learning-Assisted Intelligent Artificial Vision Platform Based on Dual-Luminescence Eu(III)-Functionalized HOF for the Diagnosis of Breast and Ovarian Cancer *Anal. Chem.*, 2023, **95**, 18889–18897.
